# Supplementary material for: A hybrid data-driven approach to analyze the drivers of lake level dynamics
Source: Copernicus journal article supplement (doi:10.5194/hess-28-4331-2024), 2024-09-20
Supplement: Supplementary file 1 [file hess-28-4331-2024-supplement.pdf]

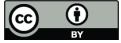

*Supplement of*

## **A hybrid data-driven approach to analyze the drivers of lake level dynamics**

**Márk Somogyvári et al.**

*Correspondence to:* Márk Somogyvári ([mark.somogyvari@hu-berlin.de](mailto:mark.somogyvari@hu-berlin.de))

The copyright of individual parts of the supplement might differ from the article licence.

## Supplementary figures

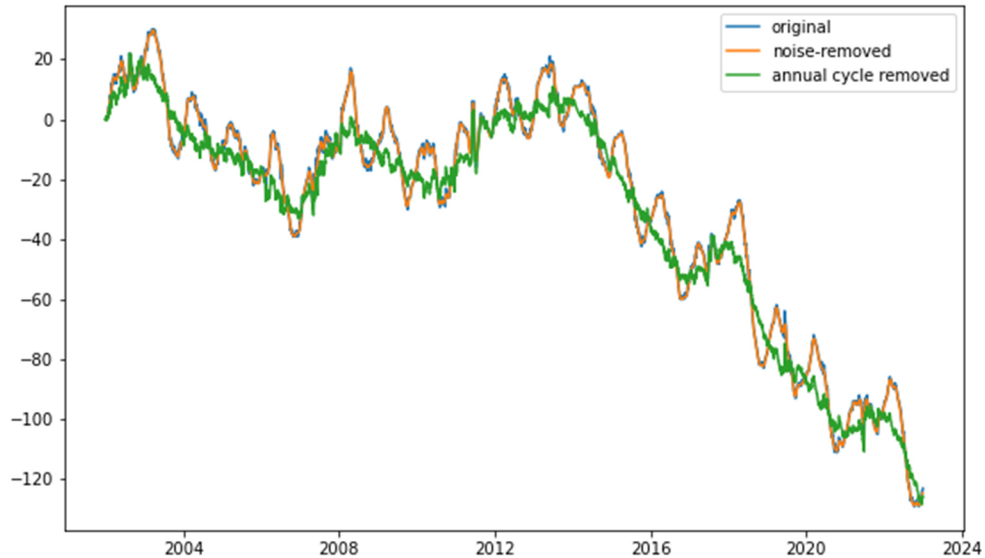

**Supplementary Figure S1:** Lake level data timeseries with different filtering conditions. Original data is the raw dataset used. The noise-removed data is created using a lowpass filter, with a 20 days cutoff frequency. The annual signal removed curve is created by a bandstop filter with a filtering window around 365 days. All filtering was done using the Butterworth filter implementation of the scipy python package.

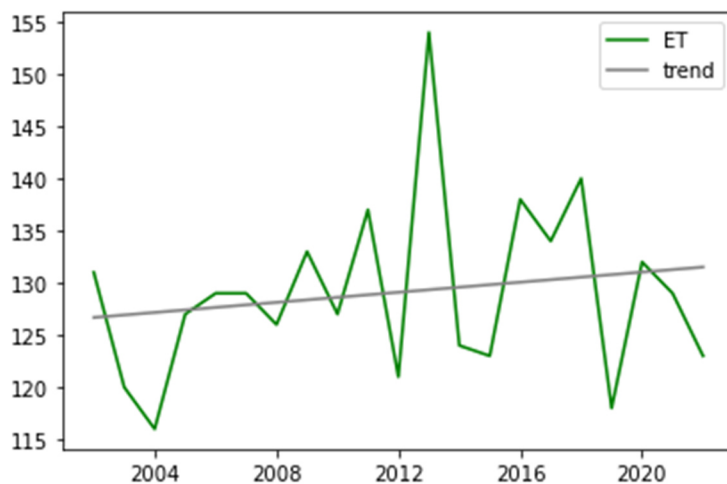

**Supplementary Figure S2:** MODIS net evapotranspiration data integrated for the Groß Glienicker lake catchment. ET is the catchment average of the MODIS MOD16A2 Version 6 total evapotranspiration product, with units of kg/m<sup>2</sup>/8day.
